# Supplementary material for: Comparison and phylogenetic analysis based on the B2L gene of orf virus from goats and sheep in China during 2009-2011
Source: PubMed Central journal article supplement (PMC4042016; doi:10.1007/s00705-013-1946-6), 2013-12-17
Supplement: 705_2013_1946_MOESM2_ESM.pdf [file 705_2013_1946_MOESM2_ESM.pdf]

**Figure S2.**

|               |          |                                                                                    |       |
|---------------|----------|------------------------------------------------------------------------------------|-------|
|               | Majority | MWPFSSIPVGDRCRVVETLPAEVASLAQGNMSTLDCFTAIAESAKKFLYICSFCCNLSSTKEGVDVKDKLCTLAKEGVDV   |       |
| China vaccine | JQ904789 | .....G.....                                                                        | I 80  |
| GX YB goat    | JQ904793 | .....                                                                              | 80    |
| JS FX goat    | JQ904791 | .....G.....G.RG..T.TP.....                                                         | 80    |
| NX YC sheep   | JQ904799 | .....H.....                                                                        | 80    |
| JL TL sheep   | JQ904795 | .....                                                                              | 80    |
| USA goat      | AY278208 | .....L.....                                                                        | 80    |
| USA sheep     | AY424970 | .....F..L.....                                                                     | N. 80 |
| USA vaccien   | AY278209 | .....YF..L.....                                                                    | N. 80 |
|               | Majority | TLLVDVQSKDKDADELREAGVNYKVKVSTREGVGNLLGSFWLSDAGHWYVGSASLTGGSVSTIKNLGLYSTNKHLDL      |       |
| China vaccine | JQ904789 | .....A..I.....                                                                     | 160   |
| GX YB goat    | JQ904793 | .....I..T.....                                                                     | 160   |
| JS FX goat    | JQ904791 | .....I..T.....                                                                     | 160   |
| NX YC sheep   | JQ904799 | .....I.....                                                                        | 160   |
| JL TL sheep   | JQ904795 | .....F.....I.....                                                                  | 160   |
| USA goat      | AY278208 | .....K.....                                                                        | 160   |
| USA sheep     | AY424970 | .....K.....                                                                        | 160   |
| USA vaccien   | AY278209 | .....K.....                                                                        | 160   |
|               | Majority | MNRVNTFYSMIVEPKVPFTRLCCAVVTPTATNPHLNHSGGGVFFSDSPERFLGFYRTLDEDLVLRHRIENAKNSIDL SLLS |       |
| China vaccine | JQ904789 | .....                                                                              | 240   |
| GX YB goat    | JQ904793 | .....                                                                              | 240   |
| JS FX goat    | JQ904791 | .....                                                                              | 240   |
| NX YC sheep   | JQ904799 | .....I.....                                                                        | 240   |
| JL TL sheep   | JQ904795 | .....I.....                                                                        | 240   |
| USA goat      | AY278208 | .....I.....D.....                                                                  | 240   |
| USA sheep     | AY424970 | .....D.....                                                                        | 240   |
| USA vaccien   | AY278209 | .....D.....                                                                        | 240   |
|               | Majority | MVPVIKHASAVEYWPQIIDALLRAAIDRGVVRVRIITEWKNADPLSVSAARSLDDFGVGSVDMSVRKFFVVPGRDDAANNT  |       |
| China vaccine | JQ904789 | .....G.....R.....                                                                  | 320   |
| GX YB goat    | JQ904793 | .....G.....R.....                                                                  | 320   |
| JS FX goat    | JQ904791 | .....G.....R.....                                                                  | 320   |
| NX YC sheep   | JQ904799 | .....N.....                                                                        | 320   |
| JL TL sheep   | JQ904795 | .....N.....                                                                        | 320   |
| USA goat      | AY278208 | .....N.....G.....                                                                  | 320   |
| USA sheep     | AY424970 | .....R.....                                                                        | 320   |
| USA vaccien   | AY278209 | .....                                                                              | 320   |
|               | Majority | KLLIVDDTF AHLTVANLDGTHYRYHAFVSVNAEKGDIVKDL SAVFERDWRSEFCKPIN                       |       |
| China vaccine | JQ904789 | .....                                                                              | 378   |
| GX YB goat    | JQ904793 | .....                                                                              | 378   |
| JS FX goat    | JQ904791 | .....                                                                              | 378   |
| NX YC sheep   | JQ904799 | .....Q.....                                                                        | 378   |
| JL TL sheep   | JQ904795 | .....                                                                              | 378   |
| USA goat      | AY278208 | .....                                                                              | 378   |
| USA sheep     | AY424970 | .....                                                                              | 378   |
| USA vaccien   | AY278209 | .....                                                                              | 378   |
