# Supplementary material for: Comparison and phylogenetic analysis based on the B2L gene of orf virus from goats and sheep in China during 2009-2011
Source: Springer Nature journal article supplement (doi:10.1007/s00705-013-1946-6), 2013-12-16

**Figure S1**

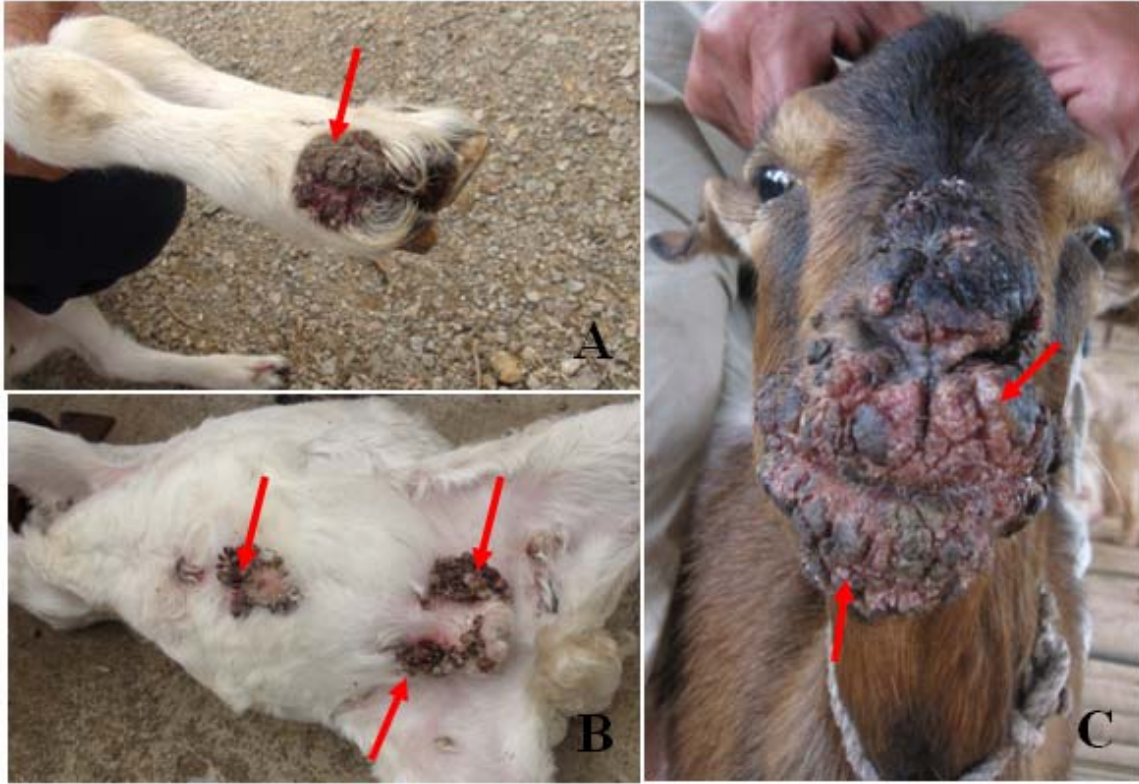

Supplement: MOESM1 [file 8649906]
